1 **TITLE PAGE**

2 **Title:** Modularity and connectivity of nest structure scale with colony size

3

4 **Authors:** Julie S. Miller<sup>1</sup>, Emma Wan<sup>1</sup> & Noa Pinter-Wollman<sup>1</sup>

5

6 **Author Affiliations**

7 1. Department of Ecology and Evolutionary Biology, University of California Los Angeles,  
8 612 Charles E. Young Dr. East, Los Angeles, CA 90095-7246.

9

10

11 **ABSTRACT**

12

13 Large body sizes have evolved structures to facilitate resource transport. Like unitary organisms,  
14 social insect colonies must transport information and resources, and colonies with more  
15 individuals may experience transport challenges similar to large-bodied organisms. In ant  
16 colonies, transport occurs in the nest, which may consist of structures that facilitate movement.  
17 We examine three attributes of nest structures that could mitigate transport challenges related to  
18 colony size: (1) subdivision - nests of species with large colonies are more subdivided to reduce  
19 viscosity of large crowds; (2) branching - nest tunnels increase branching in species with large  
20 colonies to reduce travel distances; and (3) short-cuts – nests of species with large colonies have  
21 cross-linking tunnels to connect distant parts of the nest and create alternative routes. We test  
22 these hypotheses by comparing nest structures of species with different colony sizes in  
23 phylogenetically controlled meta-analyses. Our findings support the subdivision and branching  
24 hypotheses. The nests of species with large colonies contain more, but not larger, chambers and  
25 reduce travel distances by increasing branching frequency. The similarity in how ant nests and  
26 the bodies of unitary organisms respond to increasing size suggests structural solutions that are  
27 common across levels of biological organization.

28

## 29 INTRODUCTION

30 Organisms with large body sizes are faced with the challenge of transporting nutrients, waste  
31 products, and signals across greater distances compared to organisms with small bodies (Bonner  
32 2004). This physical challenge has been resolved through a variety of structural features across  
33 the tree of life (McMahon and Bonner 1983), including multi-cellularity (Niklas and Newman  
34 2016), body plans that increase surface-area-to-volume ratios (e.g., jellyfish and sponges)  
35 (Ruppert et al. 2004), branching vascular systems in animals and plants (West G. B. et al. 1997;  
36 Banavar et al. 1999), and compartmentalization of specialized tissues into organs (Gould 1966).  
37 Social insect colonies have frequently been compared to whole organisms (Wheeler 1910; Seeley  
38 1989; Holldobler and Wilson 2009), and large colonies may experience transport challenges that  
39 are similar to those of large bodied organisms (Gillooly et al. 2010). In larger colonies, the speed  
40 and/or reliability with which resources or information reach disparate parts of the colony will  
41 depend on transfer occurring among more individuals and across greater distances (Pacala et al.  
42 1996; O'Donnell and Bulova 2007; Dornhaus et al. 2012).

43 Transport of resources and information in social insect colonies may depend on the  
44 layout of their nests. Nest structure affects the routes that individuals take as they move resources  
45 and information and therefore the way in which individuals interact (Pinter-Wollman et al. 2013;  
46 Pinter-Wollman 2015b; Tschinkel 2015; Pinter-wollman et al. 2018; Vaes et al. 2020) and  
47 behave as a collective (Burd et al. 2010; Pinter-Wollman 2015a). Having more individuals may  
48 slow the delivery of resources and information, but the physical structure of the nest can promote  
49 rapid or efficient movement. Here we investigate how features of the nest, including subdivision,  
50 branching, and short-cuts, relate to typical colony size, i.e., the average number of individuals in  
51 a colony, of different ant species.

52           Subdivision, or compartmentalization, is one way in which large systems mitigate the  
53 challenges of size. For example, large cities subdivide into smaller units, such as neighborhoods  
54 (Anas et al. 1998) and large multicellular organisms consist of subdivided cells and organs  
55 (Kempes et al. 2012; Okie 2013). The size of the units are constrained by the costs of expanding  
56 surface area-to-volume ratios (Bonner 1988; Lorenz et al. 2011). In social insect nests, larger  
57 chambers can hold more individuals, but make it harder for individuals to contact each other  
58 (Brian 1956; Aguilar et al. 2018). Constraining the size of nest chambers reduces the number of  
59 individuals occupying each chamber while reducing the distances they need to travel to interact.  
60 The “subdivision hypothesis” predicts that the nests of species with larger colony sizes will  
61 consist of more chambers compared to nests of species with small colonies, while chamber sizes  
62 will not differ in relation to colony size.

63           Another way that large systems improve transport is by increasing their connectivity and  
64 in turn, reducing travel distances. Travel distances can be reduced by branching paths. Many  
65 natural systems exhibit branching structures which reduce travel distances without the addition  
66 of cross-linking paths. For example, hierarchical branching structures are common in the  
67 vascular networks of animals (West G. B. et al. 1997; Tekin et al. 2016) and plants (McKown et  
68 al. 2010; Blonder et al. 2018). Branching structures are also common when resources enter  
69 through a single site and need to be homogeneously distributed throughout the system (Dodds  
70 2010). The “branching hypothesis” predicts that nests of species with larger colonies will have  
71 tunnels with high branching frequency to reduce travel distances in the nest.

72           Reducing travel distances and increasing connectivity can further be accomplished by  
73 adding cross-linking paths, or short-cuts, that connect distant parts of a network and create  
74 alternative access routes to maintain traffic flow (Corson 2010; Katifori et al. 2010; Bullmore

75 and Sporns 2012; Blonder et al. 2018). Indeed, the frequency of cross-linking paths often  
76 increases with population size and traffic flow (e.g., roads: Levinson 2012; and computer routing  
77 networks: Jyothi et al. 2016). The “short-cut hypothesis” predicts that nests of species with larger  
78 colonies will contain more cross-linking paths than nests of species with smaller colonies.  
79 Despite the transport benefits of adding short-cuts, every additional connection has a building  
80 and maintenance cost, and a highly connected nest may be structurally unsound (Monaenkova et  
81 al. 2015).

82         Ants offer an ideal system to study the interaction between group size and structural  
83 adjustments to size due to their large range of colony sizes (Bourke and Franks 1995) and the  
84 structural diversity of their nests (Tschinkel 2015). We focus our study on ground-nesting  
85 species because of all ants, they have the greatest potential to control the structure of their nests.  
86 Prior studies of subterranean ant nest structure in relation to colony size have focused on single  
87 species, showing that ant nests grow in volume and increase chamber size and/or number over  
88 time (Tschinkel 1987, 2004, 2005, 2011, 2015). Fewer studies have examined how tunnel  
89 connectivity changes with colony development (but see Buhl et al. 2004a), so branching patterns  
90 in ant nests are not well understood. These studies on the ontogeny of nest structure do not  
91 provide information on the evolution of nest structures in relation to their mature colony size,  
92 which we examine here in a phylogenetically controlled cross-species comparison.

93         We hypothesize that if ant colonies face size-associated challenges in transport and  
94 communication, analogous to other systems, then the structure of nests should relate to colony  
95 size in ways that ease the movement of individuals, resources, and information throughout the  
96 nest. We examine the relationship between three attributes of nest structure: (1) subdivision, (2)

97 branching and (3) and short-cuts, with colony size by comparing different ant species in  
98 phylogenetically controlled meta-analyses.

99

## 100 **METHODS**

### 101 **Obtaining nest and colony size data**

102 To test our hypotheses, we gathered data on nest architecture of subterranean ant species. We  
103 identified publications with graphical representations of ant nests by searching for the terms  
104 “nest”, “structure”, “architecture”, “casting”, and “excavation/ed” on Google Scholar and Web  
105 of Science. We identified 24 papers that contained photographs or illustrations of castings or  
106 excavations of complete ant nests with distinguishable entrances, tunnels, and chambers. For the  
107 subdivision hypothesis, we included data from an additional 3 papers containing tables with  
108 measures of chamber size and number, even though nest images were not available (Table S1).  
109 We excluded 14 publications from our dataset because interior chambers and/or tunnels were  
110 obscured, nests were constructed under artificial conditions, or were from incipient colonies  
111 (Table S2). Authors were contacted for additional images when parts of the nest were obscured,  
112 accounting for approximately 10% of the images we used. Physical castings of unpublished nests  
113 were also obtained (Table S1). When more than one nest was available for a species, we took an  
114 average of all measurable nests.

115 To relate nest structure with colony size – i.e., the number of ants in a colony - we  
116 searched the scientific literature and the web (AntWiki.org and AntWeb.org) for information on  
117 the number of workers in a mature colony. For the majority of species, we used the average  
118 colony size from the literature. When only a range (minimum - maximum) for number of ants  
119 was available, we took the midpoint. Information about the number of ants in a colony at the  
120 time of nest excavation or casting was available in less than half of the studies we obtained nest

121 structures from, but when available, we used the reported number of adult workers for those  
122 particular nests. When colony size was not available for a particular species, or when nest  
123 identity at the species level was unknown, we used colony sizes representative of the order of  
124 magnitude for the genus obtained from a sister species. This approximation was necessary for  
125 *Forelius sp* - in which colony size from *F. pruinosus* ( $10^4$ ) was used, and for *Dorymyrmex bureni*  
126 - in which colony size from *Dorymyrmex bicornis* ( $10^3$ ) was used (Table S1). We excluded  
127 *Pheidole oxyops* and *Acromyrmex subterraneus* nests from our analysis because colony size was  
128 not available for these species, and because we could not make a reliable approximation due to  
129 substantial variation in their colony size (Table S2).

130

### 131 **Nest Subdivision Hypothesis**

132 To test the subdivision hypothesis, we related colony size to the number and size of nest  
133 chambers. We counted chambers in 296 nests from 43 species in 24 genera and measured their  
134 sizes in 188 nests from 37 species in 21 genera. To quantify the size of chambers, we measured  
135 the maximum width of each chamber using ImageJ (Rueden et al. 2017). We excluded nests  
136 from the size analysis if images did not include a scale bar or if species identity was unknown for  
137 a nest (e.g., *Forelius sp.*). We used chamber width as a proxy for chamber area because we relied  
138 on 2D images of 3D structures. When we had access to physical castings, we measured chamber  
139 width directly from the structures using a measuring-tape. We validated that chamber width was  
140 a reliable indicator of chamber area using an independent dataset (see Supplemental Materials).

141 To allow for cross-species comparison, we standardized chamber width to worker size.  
142 Worker size was measured using a standard metric of ant body size, Weber's length (Brown  
143 1953), using ant profile images containing a scale bar from AntWeb.org or other publications. In

144 monomorphic species, one ant length measurement was made per species. In species with  
145 continuous worker polymorphism, we took the average length from all available images. In  
146 species with discrete worker polymorphism (i.e., majors and minors), we used a weighted  
147 average, based on typical frequency of majors according to the literature (Brown and Traniello  
148 1998; Murdock and Tschinkel 2015). Standardized widths of all chambers in each nest were  
149 averaged to obtain a single standardized chamber width per nest.

150

## 151 **Nest Connectivity**

### 152 *Nests as Networks*

153 To examine nest connectivity, we depicted each nest as a network, as in (Buhl et al. 2004b; Perna  
154 et al. 2008; Viana et al. 2013; Pinter-Wollman 2015a; Kwapich et al. 2018), by manually  
155 assigning a node ID to each chamber, nest entrance, tunnel junction, and ends of tunnels that did  
156 not reach a chamber ('end nodes') and connecting these nodes with edges depicting tunnels.  
157 When quantifying nest casts as networks we excluded the "mushroom top" where the casting  
158 material pools around the nest entrance when it is poured (Tschinkel 2010). We designated the  
159 nest entrance as the narrowest section of the mushroom top. We obtained networks of 170 nests  
160 of 38 species from 21 genera, excluding images in which the network structure could not be  
161 inferred because tunnel connections were obscured or ambiguous (Table S1 & 2). We excluded  
162 polydomous nests because it was not possible to calculate the network measures we used, mean  
163 travel distances and number cycles (see below), without information about the structure of trails  
164 connecting different nests.

165

166



167 *Branching Hypothesis*

168 To test the if branching reduces travel distances in large colonies, i.e., the ‘branching hypothesis’  
169 we quantified the length of the travel paths in a nest as the mean distance of a network. Mean  
170 distance of a network is the sum of the lengths of the shortest paths that connect all possible pairs  
171 of nodes, divided by the number of all possible node pairs:

$$\text{Mean Distance} = \frac{1}{n(n-1)} \sum_{i=1}^n d_{ij}$$

172 where  $n$  is the number of nodes, and  $d$  is the shortest path between all node pairs  $i$  and  $j$   
173 (Newman 2018). We used the “mean\_distance()” function in igraph R package (Csárdi 2020).

174 To determine if observed nests had more branching than expected based on their size,  
175 i.e., the number of nodes in the network, we compared the mean distance of networks from  
176 observed nests to mean distance of reference models of networks with known branching  
177 properties. We evaluated how mean distance relates to nest size under different assumptions  
178 about how new nodes are added to a network (i.e., generative models (Hobson et al 2021)). We  
179 used three generative reference models that represent the upper and lower bounds on  
180 connectivity for how nest networks might increase in size (Buhl et al. 2004b; Bebber et al. 2007;  
181 Tero et al. 2010; Latty et al. 2011): (1) chain networks, in which new nodes are added to the last  
182 node in a chain – i.e., no branching; (2) triangulated networks, in which new nodes are connected  
183 to at least two other nodes such that they form a triangle while avoiding edge overlap. We  
184 generated random triangulated networks using Delaunay triangulation with the deldir() function  
185 in the ‘deldir’ R package (Turner 2020). The x,y coordinates of the nodes to connect were  
186 randomly generated using the sample() function; and (3) minimum spanning trees (MSTs), in  
187 which each new node is added to a terminal node to form a new branch in a hierarchical  
188 structure. New nodes are added such that the total length of the network is minimized and no

189 cycles are formed. We generated MST networks by pruning the triangulated graphs generated in  
190 the prior step using the ‘mst’ function in the ‘igraph’ R package (Csárdi 2020). Each of the above  
191 generative processes was run for network sizes ranging from 3 to 100 nodes, in increments of  
192 one node. We repeated this process 1000 times for each network size for both triangulated  
193 networks and MSTs because they were probabilistic generative processes, but not for the chain  
194 network generation because it has only one solution. For each generated network, we calculated  
195 the mean distance to create reference distributions for comparison with the observed data  
196 (Hobson et al. 2020; Figure 2B). See R code in the supplementary materials.

197 We further scaled the observed networks to the reference models to relate mean distance  
198 to colony size (number of individuals) in a way that accounted for expected changes in network  
199 size (number of nodes). To create scaled measures of mean distance, we divided the observed  
200 mean distance by the mean value of mean distance of the reference networks (from the 1000  
201 simulations) for each network size (3-100 nodes). The closer the scaled mean distance value is to  
202 1, the more similar the observed network is to the reference model. Scaled values greater than 1  
203 indicate that the observed network has a higher mean distance than expected according to the  
204 reference model. Likewise, scaled values less than 1 indicate a smaller mean distance than  
205 expected according to the reference model. We related these scaled values with colony size using  
206 phylogenetically controlled comparisons as described below in Statistical Analyses (Figure 2C).

207

### 208 *Short-Cut Hypothesis*

209 To test if larger colonies have nests with more short-cuts, i.e., the short-cut hypothesis, we  
210 quantified short cuts using the number of cycles in a network (Buhl et al. 2004b; Pinter-Wollman

211 2015a). A cycle is a path along a network that returns to its starting node after passing through at  
212 least one other node (Newman 2018). The number of cycles in a nest is:

$$\text{Number of cycles} = m - n + 1$$

213 where  $n$  is the number of nodes and  $m$  is the number of edges. Cycles are a good approximation  
214 of the path redundancy of a network, or presence of short-cuts, indicating how often there is  
215 more than one route to any given part of the nest (Perna and Latty 2014).

216 To account for how network size affects the rate at which new cycles are added, we  
217 compared the observed nests to the reference models of networks described above. Following a  
218 similar procedure to the one described for network mean distance, we calculated the number of  
219 cycles in triangulated networks (Figure 2E) and then scaled the number of cycles in observed  
220 nests to triangulated networks of equivalent size. Because both chain and MST reference models  
221 do not produce cycles, we did not include these models when we scaled the observed nests. We  
222 related the scaled number of cycles in a nest with colony size using phylogenetically controlled  
223 comparisons as described below (Figure 2F).

224

## 225 **Statistical Analyses**

226 We examined the effect of colony size on the above nest measures while controlling for  
227 phylogeny. We used a pruned evolutionary tree of the ants (Formicidae) from (Blanchard and  
228 Moreau 2017) and calculated the mean trait value for each species. A complete species-level tree  
229 was not available for all species in our dataset, so we selected only one species per genus and ran  
230 our analysis using a genus-level tree. When there were data for more than one species per genus,  
231 we used the species which had the most nests in our dataset (subset 1 in Tables S3-S13). To  
232 ensure this sub-setting of species did not bias our results, we re-ran each analysis with previously

233 excluded species as representatives of a genus, and report the proportion of those runs that were  
234 statistically significant. See supplementary materials for results from all runs (Tables S3-13).

235 We ran phylogenetic generalized least squares (PGLS) comparing each nest trait to the  
236 log of colony size. PGLS is a multiple regression that controls for the degree of similarity  
237 between species based on phylogenetic distance in a co-variance matrix. We ran PGLS by  
238 estimating the phylogenetic signal, lambda  $\lambda$ , through maximum likelihood in the “caper”  
239 package v1.0.1 in R (Orme et al. 2018), with  $\lambda=0$  meaning no phylogenetic signal, and  $\lambda=1$   
240 meaning the observations completely match phylogeny (Pagel 1999). Due to the small sample  
241 size (20 - 24 genera) we could not estimate lambda with high confidence (Freckleton 2009).  
242 Therefore, we further conducted PGLS for fixed lambda values (0, 1) using the “ape” package  
243 v5.1 in R (Paradis et al. 2018). When our models did not meet the assumption of normality of  
244 residuals we analyzed these relationships by calculating phylogenetic independent contrasts  
245 (PICs) instead (Paradis et al. 2018). PIC transformed data were modeled using OLS regression,  
246 with the intercept set to the origin (R Core Team 2019). Due to small sample sizes, we calculated  
247 95% confidence intervals for OLS model coefficients using a bootstrap (1000 iterations).

248

## 249 **RESULTS**

### 250 **Subdivision Hypothesis**

251 Both predictions of the subdivision hypothesis, that chamber number would be larger in species  
252 with large colony sizes and that chamber size would not relate to colony size, were supported.

253 We found a statistically significant positive relationship between number of chambers per nest  
254 and colony size (Figure 1A; N= 24 genera, OLS of PIC:  $\beta = 4.024$ , 95% CI = 2.014, 6.292,  $R^2 =$   
255 0.560,  $p < 0.0001$ ; Table S3). The effect size of this relationship was large ( $3.7 < \beta < 4.3$  across

256 all data subsets) and statistically significant in all species subsets (19/19 datasets). We did not  
257 find a statistically significant relationship between the average standardized chamber width and  
258 colony size (Figure 1B; N=21 genera, OLS of PICs:  $\beta = 0.325$ , 95% CI = -0.086, 0.932,  $R^2 =$   
259 0.102,  $p = 0.15$ ; Table S4) in the majority of the species subsets (14/15 datasets). This lack of  
260 statistical significance could be attributed to low statistical power (power < 0.4 from a post-hoc  
261 power analysis based on N=21 genera, effect size = 0.1, and alpha = 0.05).  
262

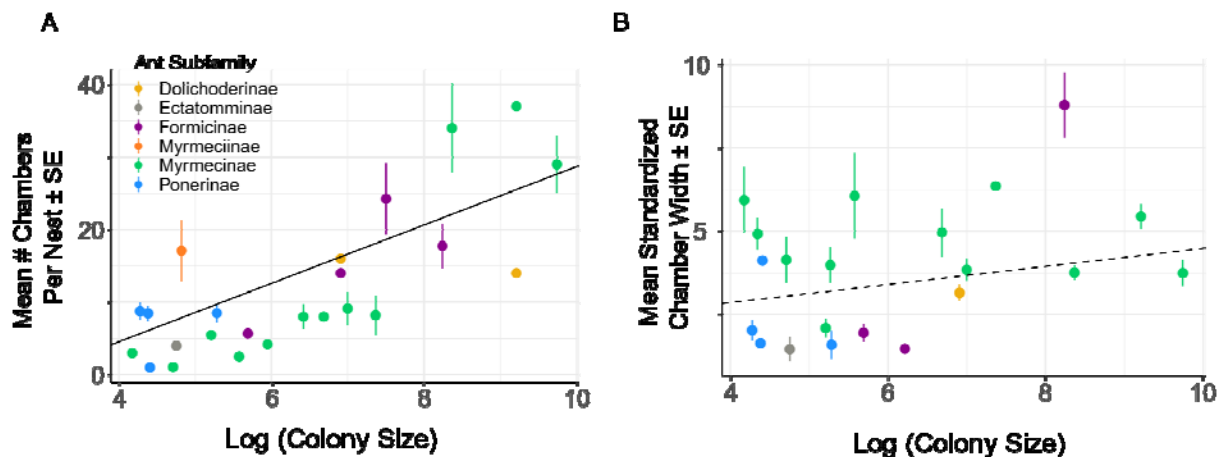

263  
264 **Figure 1:** Relationship between the log of colony size (number of ants in a colony) and (A)  
265 average number of chambers per nest or (B) average standardized chamber width. Each data  
266 point represents a mean value for a single species, whiskers indicate standard errors when  
267 multiple nests were sampled. Colors represent ant subfamilies. Lines are fits from the PGLS  
268 ( $\lambda=1$ ) with a statistically significant fit as a solid line and a relationship that is not statistically  
269 significant is a dashed line.

270

271 **Branching Hypothesis**

272 The “branching hypothesis”, that branching would reduce travel distances in nests of species  
273 with large colonies, was supported. Raw, unscaled, mean distance of nests significantly increased  
274 with colony size (Figure 2A;  $N = 21$  genera, PGLS  $\lambda = \text{MaxLL}$ :  $\beta = 1.36 \pm 0.247$ ,  $\lambda = 0.585$ ,  $R^2 =$   
275  $0.615$ ,  $p = 0.0007$ ;  $\lambda = 1$ :  $\beta = 0.844 \pm 0.227$ ,  $p = 0.0015$ ;  $\lambda = 0$ :  $\beta = 1.013 \pm 0.251$ ,  $p < 0.0001$ ; Tables  
276 S5-S7). In the chain network reference models, mean distance increased fastest and linearly with  
277 network size (i.e., number of nodes; Figure 2B). In the triangulated reference models, mean  
278 distances were smallest and increased nonlinearly, slowing their rate of increase with increasing  
279 network size. In the MST reference models, mean distances were intermediate between the  
280 values expected from the chain and triangulated reference models, and also increased nonlinearly  
281 (Figure 2B). The mean distances of empirically observed nests were between the expected  
282 values for chain and MST reference models (Figure 2B). When we scaled the observed mean  
283 distance with the expected mean distance based on each of the three reference models, we found  
284 that the relationship between scaled mean distance and colony size differed across the three  
285 models (Figure 2C). Mean distances scaled to chain networks declined with colony size and the  
286 relationship was statistically significant in almost all data subsets (15/16 datasets; PGLS  $\lambda = 1$ :  $\beta$   
287  $= -0.055 \pm 0.024$ ,  $p = 0.031$ ; 16/16 datasets;  $\lambda = 0$ :  $\beta = -0.061 \pm 0.024$ ,  $p = 0.018$ ; Tables S8 & S9).  
288 In contrast, mean distances scaled to triangulated networks increased significantly with colony  
289 size in almost all the data subsets (15/16 datasets; OLS of PIC:  $\beta = 0.236$ , 95% CI = 0.055,  
290 0.466,  $R^2 = 0.348$ ,  $p = 0.0048$ ; Table S10). Mean distances scaled to MSTs also increased  
291 significantly with colony size (15/16 species subsets), but the effect size was smaller than for  
292 triangulated networks (OLS of PIC:  $\beta = 0.11$ , 95% CI = -0.022, 0.240,  $R^2 = 0.281$ ,  $p = 0.013$ ;  
293 Table S11).  
294

295 **Short-cut Hypothesis**

296 The “short-cut hypothesis,” that nests from species with larger colonies would contain more  
297 cycles, was not supported. The relationship between the number of cycles in a nest had a positive  
298 relationship with colony size, but this trend was not statistically significant in the majority of the  
299 data subsets (Figure 2D; 15/16 subsets;  $N = 21$  genera, OLS of PIC:  $\beta = 0.293$ , 95% CI = -0.089,  
300 0.528,  $R^2 = 0.160$ ,  $p = 0.072$ ; Table S12). The triangulated reference networks showed a steep  
301 increase in the number of cycles as a function of network size, and far exceeded the number of  
302 cycles in observed nests given their networks’ size (Figure 2E). However, the number of cycles  
303 in observed nests was similar to that expected from the chain and MST reference networks,  
304 which do not produce cycles at any network size (Figure 2E). The measure of cycles scaled to  
305 the triangulated reference models significantly decreased with colony size in all species subsets  
306 (16/16 subsets; Figure 2F; OLS of PIC:  $\beta = -0.048$ , 95% CI = -0.102, -0.015,  $R^2 = 0.090$ ,  $p =$   
307 0.186; Tables S13).

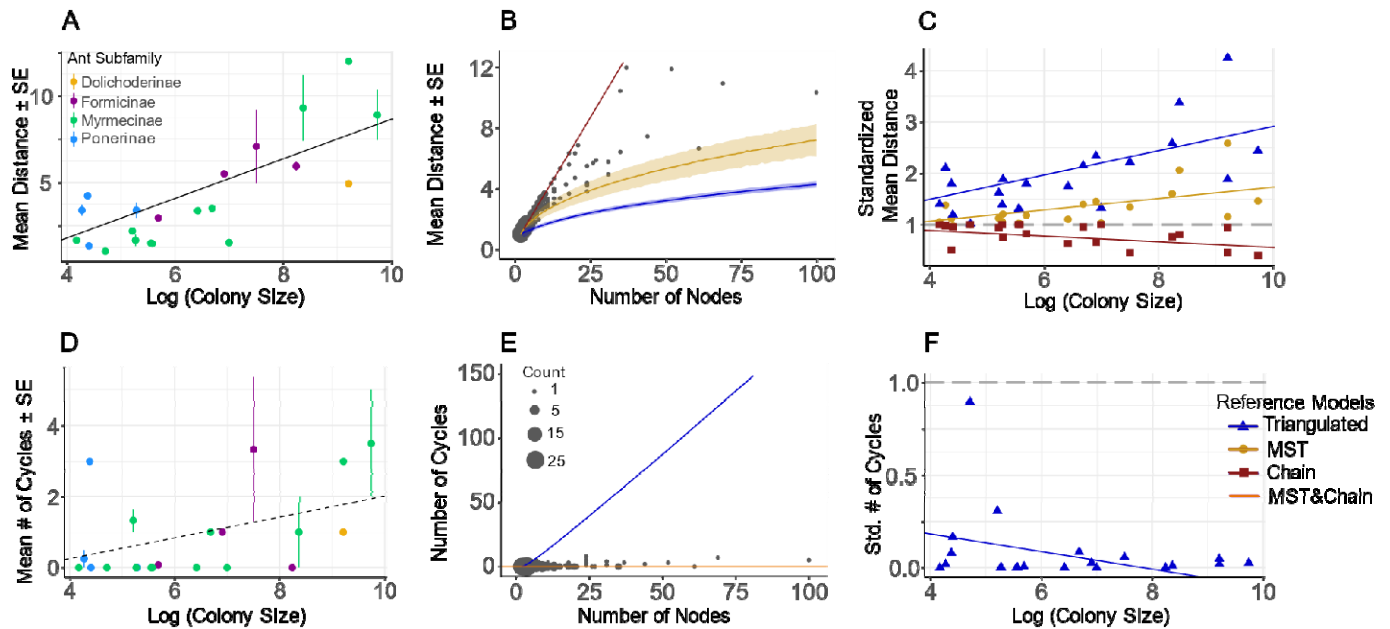

308

309 **Figure 2: Nest Connectivity: branching (A-C) and short-cut (D-F) hypotheses. (A, D)**

310 Relationship between colony size (average number of ants in a colony) and (A) network mean

311 distance and (D) mean number of cycles in nests. Each data point represents a mean value for a

312 single species, whiskers indicate standard errors around the mean when multiple nests were

313 sampled for a given species, colors represent ant subfamily (see legend in A). Dashed line is the

314 regression fit for PGLS when  $\lambda=1$ , solid when statistically significant and dashed when not

315 statistically significant; (B, E) The mean distance (B) or number of cycles (E) according to

316 network size (number of nodes). Networks from observed nests are plotted as grey dots, sized

317 according to sample size. In (B) lines are mean distances as a function of number of nodes for

318 chain (red), MST (yellow) and triangulated (blue) reference networks, with 95% confidence

319 intervals from 1000 simulation runs shown as shading around the lines; in (E) Blue line is the

320 number of cycles in triangulated networks as a function of number of nodes. Orange line depicts

321 the number of cycles for both MSTs and chain networks, which contain zero cycles at all



322 network sizes; (C, F) Relationship between colony size (average number of ants in a colony) and  
323 scaled mean distance (C) and scaled number of cycles (F). Mean distance (C) is scaled to chain  
324 (red), MST (yellow) and triangulated (blue) networks. Cycles (F) are only scaled to triangulated  
325 networks (blue). Each point represents a mean of scaled values from the nests of each species.  
326 Grey dashed line at  $y=1$  represents values at which observed nests contain the same value as  
327 expected from the reference model. Values below the dashed line indicate networks that have  
328 lower values than expected by the reference model. Values above the dashed line indicate  
329 networks which have values greater than expected according to the reference model. Solid  
330 colored lines indicate statistically significant regression fits for PGLS ( $\lambda=1$ ).

331

## 332 **DISCUSSION**

333 Our results support the hypothesis that nest architecture mitigates the challenges of larger colony  
334 sizes, i.e., more individuals in a colony. Our comparative analysis found that nests of species  
335 with larger colonies are more subdivided and reduce travel distances through increased  
336 branching. Overall, we did not find a strong effect of phylogeny.

337 As predicted by the subdivision hypothesis, the number of chambers was greater in species  
338 with larger colonies and chamber size was not related to colony size (Figure 1). These results  
339 suggest that nests of species with large colonies are divided into more sub-units than nests of  
340 species with small colonies, and that the size of those sub-units does not increase proportionately  
341 to colony size. Similar patterns of increased spatial subdivision with body size are the  
342 cornerstone of multi-cellularity (Bonner 1998), and also characterize subdivision as the brain  
343 (Kaas 2000) and cities (Anas et al. 1998) increase in size. Given our correlational findings, it  
344 remains unclear if subdivision in nests serves a similar function as it does in these other systems.

345 Further data are needed on the distribution of individuals throughout nest chambers to determine  
346 if ants utilize chambers in a way that is consistent with subdivision (e.g. Tschinkel 1999;  
347 Murdock and Tschinkel 2015). Nest subdivision may facilitate division of labor through spatial  
348 segregation of tasks (Tofts and Franks 1992; Richardson et al. 2011; Mersch et al. 2013), and  
349 slow down the spread of disease (Pie et al. 2004; Stroeymeyt et al. 2014, 2018). However, the  
350 only direct test of the benefit of nest subdivision showed that subdivision does not increase brood  
351 rearing efficiency (Cassill et al. 2002; Tschinkel 2018). Limits on chamber size may also be  
352 imposed by physiological processes, such as gas exchange or temperature regulation (Jones and  
353 Oldroyd 2006), or by structural constraints, because large chambers may collapse. Thus, the  
354 causes and consequences of nest sub-division remain to be tested.

355 The connectivity of nests changed according to colony size, but only one of our hypotheses  
356 about nest connectivity was supported. The nests of species with larger colonies had reduced  
357 travel distances due to their branching structure, consistent with the branching hypothesis. In the  
358 nests of species with small colonies (i.e., up to ~1000 workers in nests containing up to ~10  
359 nodes), mean distances tended to match the values expected for chain networks, and indeed the  
360 nests of many small colony species were chains. In the nests of species with large colonies, mean  
361 travel distances were shorter than would be expected for chain networks but greater than  
362 expected for MSTs, and far greater than expected for triangulated networks (Figure 2B, C).  
363 These findings indicate that the nests of species with large colonies have increased branching  
364 (i.e., are more tree-like) relative to the nests of species with smaller colonies. By increasing the  
365 frequency of branching large colonies may curb rising travel distances as their nests increase in  
366 size (i.e., contain more chambers). Networks cannot simultaneously minimize travel distances  
367 (i.e., be highly interconnected) and minimize their number of edges (i.e., minimize infrastructure

368 costs). Increased branching is a common way for biological transport networks to balance this  
369 trade-off (e.g., ant foraging trails: Buhl et al. 2009; slime molds: Tero et al. 2010; neural  
370 networks: Raj and Chen 2011; plant growth forms: Conn et al. 2017), especially as body size, or  
371 population size, increases (Ringo 1991; Banavar et al. 1999; Ercsey-Ravasz et al. 2013; Cabanes  
372 et al. 2015). Branching is thus a low-cost way for biological transport networks, including ant  
373 nests, to maintain connectivity as they increase in size.

374 The short-cuts hypothesis, that nests from species with larger colonies will have more cross-  
375 linking paths or cycles, was not supported. Although the number of cycles in a nest increased  
376 with colony size, this increase was not statistically significant (Figure 2D). Cycles were added at  
377 a slower rate than expected for a triangulated network (Figure 2E), which is not surprising given  
378 that triangulations represent the maximum rate at which new cycles could be added with  
379 increasing network size (for 2D networks). This finding lends further support to the conclusion  
380 that the increase in connectivity with colony size is due to increased branching and not the  
381 addition of short-cuts. However, we caution that our analysis conservatively excludes nests that  
382 might have the most cycles because we could not accurately infer the topology of the most  
383 convoluted nests. Our inability to detect a significant increase in the number of cycles with  
384 colony size could be due to this bias in our dataset. More refined imaging techniques could  
385 provide a solution to this issue and expand future work on nest architecture in general.

386 The scarcity of cycles in the nests we measured suggest that the benefits of having  
387 alternative access routes, which help maintain movement (Corson 2010; Katifori et al. 2010;  
388 Blonder et al. 2018, Jyothi et al. 2016) and facilitate forager recruitment (Pinter-Wollman 2015),  
389 might not outweigh the potential costs of additional tunnels. For instance, there are costs to  
390 building and maintaining tunnels (da Silva Camargo et al. 2013; Monaenkova et al. 2015) and

391 there may be negative consequences of many cross-linking paths, including structural instability  
392 or heightened exposure to risks, like pathogens (Scovell 1983; Viana et al. 2013; Stroeymeyt et  
393 al. 2014, 2018), parasites (Scovell 1983), or predators (Jeanne 1975; LaPolla et al. 2002). Nests  
394 are multi-purpose structures that have other functions, like thermoregulation, humidity control or  
395 ventilation (Jones and Oldroyd 2006; King et al. 2015), which might suffer when nests have  
396 many cycles. In systems where the costs of cross-linking paths are low, like the plasmodia of  
397 slime molds, the mycelia of fungus, or the pheromone trails of ants, cycles are ephemeral and  
398 created for exploration, yet they are pruned once resources are discovered (Bebber et al. 2007;  
399 Buhl et al. 2009; Tero et al. 2010; Latty et al. 2011). Conversely, when the benefits to movement  
400 are very high, as in some man-made networks like urban roads or computer routing networks,  
401 cycles become more common as size increases (Levinson 2012; Jyothi et al. 2016). Future  
402 investigation into the building costs of tunnels and the functional consequences of interconnected  
403 nest structures will help reveal why ant nests do not contain more short-cuts, or cycles.

404 As with any meta-analysis, our dataset is constrained by the available literature. Many of  
405 the nests we found in the literature were built in sandy soils, and so our analysis has an over-  
406 representation of species adapted to the climate and ecology of sandy soils (Table S1). Fungus  
407 growers are highly-represented in our analysis, and constraints imposed by requirements to  
408 maintain healthy fungus gardens could have influenced our findings. Additionally, because we  
409 do not have data on the size or age of the colonies that built the majority of nests in our meta-  
410 analysis, we might have included immature colonies that have not reached their full size. Further  
411 work could investigate whether nest connectivity changes throughout development within a  
412 species in natural environments (e.g., Tschinkel 1987, 2004, 2005, 2011) or whether there are  
413 species-specific connectivity patterns that can be found at different ages.

414 In conclusion, we show that ant nests exhibit modular and efficient structures in species  
415 with larger colonies. The similarity in how ant nests and the bodies of unitary organisms respond  
416 to increasing size suggest that their shared architectural features, branching transportation  
417 networks and compartmentalization, provide common solutions to the challenges created by  
418 large size across the tree of life.

419

#### 420 **Acknowledgements**

421 We are thankful to Doug Booher for sharing his nest castings and to Walter Tschinkel for  
422 additional images of his published castings. We thank Dana Williams, Felipe Zapata, Kevin  
423 Loope, Tyler McCraney and the UCLA IDRE statistical consulting unit for advice on the  
424 statistical analysis and to Saray Shai for advice on generating reference models. We thank Gabby  
425 Najm, James Lichtenstein, Sean O’Fallon, Natalie Lemanski and two anonymous reviewers for  
426 helpful comments on the manuscript.

427

428

429

#### 430 **REFERENCES**

431 Aguilar, J., D. Monaenkova, V. Linevich, W. Savoie, B. Dutta, H.-S. Kuan, M. D. Betterton, M.

432 A. D. Goodisman, and D. I. Goldman. 2018. Collective clog control: Optimizing traffic

433 flow in confined biological and robophysical excavation. *Science* (80-. ). 361:672–677.

434 Anas, A., R. Arnott, and K. A. Small. 1998. Urban spatial structure. *Am. Econ. Assoc.* 36:1426–

435 1464.

436 Banavar, J. R., A. Maritan, and A. Rinaldo. 1999. Size and form in efficient transportation

437 networks. *Nature* 399:130–132.

438 Bebbber, D. P., J. Hynes, P. R. Darrah, L. Boddy, and M. D. Fricker. 2007. Biological solutions to

439 transport network design. *Proc. R. Soc. B Biol. Sci.* 274:2307–2315.

- 440 Blanchard, B. D., and C. S. Moreau. 2017. Defensive traits exhibit an evolutionary trade-off and  
441 drive diversification in ants. *Evolution* (N. Y). 71:315–328.
- 442 Blonder, B., N. Salinas, L. P. Bentley, A. Shenkin, P. O. Chambi Porroa, Y. Valdez Tejeira, T. E.  
443 Boza Espinoza, G. R. Goldsmith, L. Enrico, R. Martin, G. P. Asner, S. Díaz, B. J. Enquist,  
444 and Y. Malhi. 2018. Structural and defensive roles of angiosperm leaf venation network  
445 reticulation across an Andes–Amazon elevation gradient. *J. Ecol.* 106:1683–1699.
- 446 Bonner, J. T. 2004. Perspective: The Size-Complexity Rule. *Evolution* (N. Y). 58:1883–1890.
- 447 Bonner, J. T. 1988. *The Evolution of Complexity by Means of Natural Selection*. Princeton  
448 University Press, Princeton, NJ.
- 449 Bonner, J. T. 1998. The origins of multicellularity. *Integr. Biol.* 1:27–36.
- 450 Bourke, A. F., and N. R. Franks. 1995. *Social Evolution in Ants*. Princeton University Press,  
451 Princeton, NJ.
- 452 Brian, M. V. 1956. Group Form and Causes of Working Inefficiency in the Ant *Myrmica rubra*  
453 L. *Physiol. Zool.* 29:173–194.
- 454 Brown, J. J., and J. F. A. Traniello. 1998. Regulation of Brood-Care Behavior in the Dimorphic  
455 Castes of the Ant *Pheidole morrisi* (Hymenoptera: Formicidae): Effects of Caste Ratio ,  
456 Colony Size , and Colony Needs. *J. Insect Behav.* 11:209–219.
- 457 Brown, W. L. 1953. Revisionary Studies in the Ant Tribe Dacetini. *Am. Midl. Nat.* 50:1.
- 458 Buhl, J., J. Gautrais, J.-L. Deneubourg, and G. Theraulaz. 2004a. Nest excavation in ants:   
459 group size effects on the size and structure of tunneling networks. *Naturwissenschaften*  
460 91:602–606.

- 461 Buhl, J., J. Gautrais, R. V Sole, P. Kuntz, S. Valverde, J.-L. Deneubourg, and G. Theraulaz.  
462 2004b. Efficiency and robustness of ant networks of galleries. *Eur. Phys. J. B* 129:123–129.
- 463 Buhl, J., K. Hicks, E. R. Miller, S. Persey, O. Alinvi, and D. J. T. Sumpter. 2009. Shape and  
464 efficiency of wood ant foraging networks. *Behav. Ecol. Sociobiol.* 63:451–460.
- 465 Bullmore, E., and O. Sporns. 2012. The economy of brain network organization. *Nat. Rev.*  
466 *Neurosci.* 13:336–349.
- 467 Burd, M., N. Shiwakoti, M. Sarvi, and G. Rose. 2010. Nest architecture and traffic flow: large  
468 potential effects from small structural features. *Ecol. Entomol.* 35:464–468.
- 469 Cabanes, G., E. Van Wilgenburg, M. Beekman, and T. Latty. 2015. Ants build transportation  
470 networks that optimize cost and efficiency at the expense of robustness. *Behav. Ecol.*  
471 26:223–231.
- 472 Cassill, D., W. R. Tschinkel, and S. B. Vinson. 2002. Nest complexity , group size and brood  
473 rearing in the fire ant , *Solenopsis invicta*. *Insectes Soc.* 49:158–163.
- 474 Conn, A., U. V. Pedmale, J. Chory, and S. Navlakha. 2017. High-Resolution Laser Scanning  
475 Reveals Plant Architectures that Reflect Universal Network Design Principles. *Cell Syst.*  
476 5:53-62.e3. Elsevier Inc.
- 477 Corson, F. 2010. Fluctuations and Redundancy in Optimal Transport Networks. 048703:1–4.
- 478 Csárdi, G. 2020. Package ‘igraph’: Network Analysis and Visualization.
- 479 da Silva Camargo, R., J. F. S. Lopes, and L. C. Forti. 2013. Energetic cost of digging behavior in  
480 workers of the leaf-cutting ant *Atta sexdens* (Fabricius). *Rev. Bras. Entomol.* 57:401–404.
- 481 Dodds, P. S. 2010. Optimal form of branching supply and collection networks. *Phys. Rev. Lett.*

- 482 104:1–4.
- 483 Dornhaus, A., S. Powell, and S. Bengston. 2012. Group size and its effects on collective  
484 organization. *Annu. Rev. Entomol.* 57:123–41.
- 485 Ercsey-Ravasz, M., N. T. Markov, C. Lamy, D. C. VanEssen, K. Knoblauch, Z. Toroczkai, and  
486 H. Kennedy. 2013. A Predictive Network Model of Cerebral Cortical Connectivity Based  
487 on a Distance Rule. *Neuron* 80:184–197.
- 488 Freckleton, R. P. 2009. The seven deadly sins of comparative analysis. *J. Evol. Biol.* 22:1367–  
489 1375.
- 490 Gillooly, J. F., C. Hou, and M. Kaspari. 2010. Eusocial insects as superorganisms: Insights from  
491 metabolic theory. *Commun. Integr. Biol.* 3:360–362.
- 492 Gould, S. J. 1966. Allometry and size in ontogeny and phylogeny. *Biol. Rev. Camb. Philos. Soc.*  
493 41:587–640.
- 494 Hobson, E. A., M. J. Silk, N. H. Fefferman, D. B. Larremore, P. Rombach, S. Shai, and N.  
495 Pinter-Wollman. 2020. A guide to choosing and implementing reference models for social  
496 network analysis. *arXiv*.
- 497 Holldobler, B., and E. O. Wilson. 2009. *The superorganism: the beauty, elegance, and*  
498 *strangeness of insect societies* Title. W.W. Norton, New York.
- 499 Jeanne, R. L. 1975. The Adaptiveness of Social Wasp Nest Architecture. *Q. Rev. Biol.* 50:267–  
500 287.
- 501 Jones, J. C., and B. P. Oldroyd. 2006. Nest Thermoregulation in Social Insects. *Adv. In Insect*  
502 *Phys.* 33:153–191.



- 503 Jyothi, S. A., A. Singla, P. B. Godfrey, and A. Kolla. 2016. Measuring and Understanding  
504 Throughput of Network Topologies. *Int. Conf. High Perform. Comput. Networking, Storage*  
505 *Anal. SC* 0:761–772.
- 506 Kaas, J. H. 2000. Why is Brain Size so Important: Design Problems and Solutions as Neocortex  
507 Gets Bigger or Smaller. *Brain Mind* 1:7–23.
- 508 Katifori, E., G. J. Szöllosi, and M. O. Magnasco. 2010. Damage and fluctuations induce loops in  
509 optimal transport networks. *Phys. Rev. Lett.* 104:1–4.
- 510 Kempes, C. P., S. Dutkiewicz, and M. J. Follows. 2012. Growth, metabolic partitioning, and the  
511 size of microorganisms. *Proc. Natl. Acad. Sci.* 109:495–500.
- 512 King, H., S. A. Ocko, and L. Mahadevan. 2015. Termite mounds harness diurnal temperature  
513 oscillations for ventilation. *Proc. Natl. Acad. Sci.* 112:11589–11593.
- 514 Kwapich, C. L., G. Valentini, and B. Hölldobler. 2018. The non-additive effects of body size on  
515 nest architecture in a polymorphic ant. *Philos. Trans. R. Soc. B* 373:20170235.
- 516 LaPolla, J. S., U. G. Mueller, M. Seid, and S. P. Cover. 2002. Predation by the army ant  
517 *Neivamyrmex rugulosus* on the fungus-growing ant *Trachymyrmex arizonensis*. *Insectes*  
518 *Soc.* 49:251–256.
- 519 Latty, T., K. Ramsch, K. Ito, T. Nakagaki, D. J. T. Sumpter, M. Middendorf, and M. Beekman.  
520 2011. Structure and formation of ant transportation networks. *J. R. Soc. Interface* 8:1298–  
521 1306.
- 522 Levinson, D. 2012. Network structure and city size. *PLoS One* 7:e29721.
- 523 Lorenz, D. M., A. Jeng, and M. W. Deem. 2011. The emergence of modularity in biological

- 524 systems. *Phys Life Rev.* 8:129–160.
- 525 McKown, A. D., H. Cochard, and L. Sack. 2010. Decoding leaf hydraulics with a spatially  
526 explicit model: Principles of venation architecture and implications for its evolution. *Am.*  
527 *Nat.* 175:447–460.
- 528 McMahon, T. A., and J. T. Bonner. 1983. *On Size and Life*. Scientific American Books, Inc,  
529 New York.
- 530 Mersch, D. P., A. Crespi, and L. Keller. 2013. Tracking individuals shows spatial fidelity is a  
531 key regulator of ant social organization. *Science* (80-. ). 340:1090–3.
- 532 Monaenkova, D., N. Gravish, G. Rodriguez, R. Kutner, M. A. D. Goodisman, and D. I.  
533 Goldman. 2015. Behavioral and mechanical determinants of collective subsurface nest  
534 excavation. *J. Exp. Biol.* 218:1295–1305.
- 535 Murdock, T. C., and W. R. Tschinkel. 2015. The life history and seasonal cycle of the ant,  
536 *Pheidole morrisi* Forel, as revealed by wax casting. *Insectes Soc.* 62:265–280.
- 537 Newman, M. E. J. 2018. *Networks: An Introduction*. 2nd Editio. Oxford University Press,  
538 Oxford.
- 539 Niklas, K. J., and S. A. Newman (eds). 2016. *Multicellularity: Origins and Evolution*. MIT Press,  
540 Cambridge, MA.
- 541 O'Donnell, S., and S. J. Bulova. 2007. Worker connectivity: A review of the design of worker  
542 communication systems and their effects on task performance in insect societies. *Insectes*  
543 *Soc.* 54:203–210.
- 544 Okie, J. G. 2013. General models for the spectra of surface area scaling strategies of cells and

- 545 organisms: Fractality, geometric dissimilitude, and internalization. *Am. Nat.* 181:421–439.
- 546 Orme, A. D., R. Freckleton, G. Thomas, T. Petzoldt, N. Isaac, W. Pearse, and M. D. Orme. 2018.
- 547 Package ‘caper’: Comparative Analyses of Phylogenetics and Evolution in R.
- 548 Pacala, S. W., D. M. Gordon, and H. C. J. Godfray. 1996. Effects of social group size on
- 549 information transfer and task allocation. *Evol. Ecol.* 10:127–165.
- 550 Pagel, M. 1999. Inferring historical patterns of biological evolution. *Nature* 401:877–884.
- 551 Paradis, E., S. Blomberg, B. Bolker, J. Brown, J. Claude, H. S. Cuong, R. Desper, G. Didier, B.
- 552 Durand, J. Dutheil, R. Ewing, O. Gascuel, T. Guillerme, C. Heibl, A. Ives, B. Jones, F.
- 553 Krah, D. Lawson, V. Lefort, P. Legendre, J. Lemon, E. Marcon, R. McCloskey, J.
- 554 Nylander, R. Opgen-Rhein, A.-A. Popescu, M. Royer-Carenzi, K. Schliep, K. Strimmer,
- 555 and D. de Vienne. 2018. Package ‘ape’: Analyses of Phylogenetics and Evolution.
- 556 Perna, A., C. Jost, E. Couturier, S. Valverde, S. Douady, and G. Theraulaz. 2008. The structure
- 557 of gallery networks in the nests of termite *Cubitermes* spp. revealed by X-ray tomography.
- 558 *Naturwissenschaften* 95:877–884.
- 559 Perna, A., and T. Latty. 2014. Animal transportation networks. *J. R. Soc. Interface* 11.
- 560 Pie, M. R., R. B. Rosengaus, and J. F. A. Traniello. 2004. Nest architecture , activity pattern ,
- 561 worker density and the dynamics of disease transmission in social insects. *J. Theor. Biol.*
- 562 226:45–51.
- 563 Pinter-Wollman, N. 2015a. Nest architecture shapes the collective behaviour of harvester ants.
- 564 *Biol. Lett.* 11:20150695-.
- 565 Pinter-Wollman, N. 2015b. Persistent variation in spatial behavior affects the structure and

- 566 function of interaction networks. *Curr. Zool.* 61:98–106.
- 567 Pinter-Wollman, N., A. Bala, A. Merrell, J. Queirolo, M. C. Stumpe, S. Holmes, and D. M.  
568 Gordon. 2013. Harvester ants use interactions to regulate forager activation and availability.  
569 *Anim. Behav.* 86:197–207. Elsevier Ltd.
- 570 Pinter-wollman, N., A. Penn, G. Theraulaz, and S. M. Fiore. 2018. Interdisciplinary approaches  
571 for uncovering the impacts of architecture on collective behaviour. *Philos. Trans. R. Soc. B*  
572 373:20170232.
- 573 R Core Team. 2019. R: A language environment for statistical computing.
- 574 Raj, A., and Y. H. Chen. 2011. The wiring economy principle: Connectivity determines anatomy  
575 in the human brain. *PLoS One* 6.
- 576 Richardson, T. O., K. Christensen, N. R. Franks, H. J. Jensen, and A. B. Sendova-franks. 2011.  
577 *Ants in a Labyrinth*: A Statistical Mechanics Approach to the Division of Labour. *PLoS*  
578 *One* 6:e18416.
- 579 Ringo, J. L. 1991. Neuronal interconnection as a function of brain size. *Brain. Behav. Evol.*  
580 38:1–6.
- 581 Rueden, C. T., J. Schindelin, M. C. Hiner, B. E. DeZonia, A. E. Walter, E. T. Arena, and K. W.  
582 Eliceiri. 2017. ImageJ2: ImageJ for the next generation of scientific image data. *BMC*  
583 *Bioinformatics* 18:1–26.
- 584 Ruppert, E. E., R. S. Fox, and R. D. Barnes. 2004. *Invertebrate Zoology: A Functional*  
585 *Evolutionary Approach*. Thomson-Brooks/Cole.
- 586 Scovell, E. 1983. Dominance and reproductive success among slave-making worker ants. *Nature*

- 587           304:724–725.
- 588   Seeley, T. D. 1989. The honey bee colony as a superorganism. *Am. Sci.* 77:546–553.
- 589   Stroeymeyt, N., B. Casillas-Pérez, and S. Cremer. 2014. Organisational immunity in social  
590           insects. *Curr. Opin. Insect Sci.* 5:1–15.
- 591   Stroeymeyt, N., A. V Grasse, A. Crespi, D. P. Mersch, S. Cremer, and L. Keller. 2018. Social  
592           network plasticity decreases disease transmission in a eusocial insect. *Science* (80-. ).  
593           362:941–945.
- 594   Tekin, E., D. Hunt, M. G. Newberry, and V. M. Savage. 2016. Do Vascular Networks Branch  
595           Optimally or Randomly across Spatial Scales? *PLoS Comput. Biol.* 12:e1005223.
- 596   Tero, A., S. Takagi, T. Saigusa, K. Ito, D. P. Bebbler, M. D. Fricker, K. Yumiki, R. Kobayashi,  
597           and T. Nakagaki. 2010. Rules for biologically inspired adaptive network design. *Science*  
598           (80-. ). 327:439–442.
- 599   Tofts, C., and N. R. Franks. 1992. Doing the right thing: Ants, honeybees and naked mole-rats.  
600           *Trends Ecol. Evol.* 7:346–349.
- 601   Tschinkel, W. R. 2010. Methods for casting subterranean ant nests. *J. Insect Sci.* 88:1–17.
- 602   Tschinkel, W. R. 1987. Seasonal life history and nest architecture of a winter-active ant,  
603           *Prenolepis imparis*. *Insectes Soc.* 34:143–164.
- 604   Tschinkel, W. R. 1999. Sociometry and sociogenesis of colonies of the harvester ant,  
605           *Pogonomyrmex badius*: distribution of workers, brood and seeds within the nest in relation  
606           to colony size and season. *Ecol. Entomol.* 24:222–237.
- 607   Tschinkel, W. R. 2018. Testing the effect of a nest architectural feature in the fire ant *Solenopsis*

- 608           *invicta* (Hymenoptera: Formicidae). *Myrmecological News* 27:1–5.
- 609   Tschinkel, W. R. 2015. The architecture of subterranean ant nests: beauty and mystery underfoot.  
610           *J. Bioeconomics* 17:271–291.
- 611   Tschinkel, W. R. 2005. The nest architecture of the, ant *Camponotus socius*. *J. Insect Sci.* 5:1–  
612           18.
- 613   Tschinkel, W. R. 2004. The nest architecture of the Florida harvester ant , *Pogonomyrmex*  
614           *badius*. *J. Insect Sci.* 21:1–19.
- 615   Tschinkel, W. R. 2011. The nest architecture of three species of north Florida *Aphaenogaster*  
616           ants. *J. insect Sci.* 11:1–30.
- 617   Turner, R. 2020. Package ‘*deldir*’: Delaunay Triangulation and Dirichlet (Voronoi) Tessellation  
618           Author.
- 619   Vaes, O., A. Perna, and C. Detrain. 2020. The effect of nest topology on spatial organization and  
620           recruitment in the red ant *Myrmica rubra*. *Sci. Nat.* 107. *The Science of Nature*.
- 621   Viana, M. P., V. Fourcassié, A. Perna, F. Costa, and C. Jost. 2013. Accessibility in networks□:  
622           A useful measure for understanding social insect nest architecture. *Chaos, Solitons and*  
623           *Fractals* 46:38–45. Elsevier Ltd.
- 624   West G. B., Brown J. H., and Enquist B. J. 1997. A General Model for the Origin of Allometric  
625           Scaling Laws in Biology. *Science* (80-. ). 276:122–126.
- 626   Wheeler, W. M. 1910. *Ants: Their structure, Development and Behavior*. Columbia University  
627           Press, New York.
- 628
